# Supplementary material
Source: PubMed Central journal article supplement (PMC4127665)
Supplement: NIHMS610138-supplement-Supp_Material.pdf [file NIHMS610138-supplement-Supp_Material.pdf]

## Supporting Tables

Table S1 Overview of protein training and test sets

|          | Training Set | Test Set |
|----------|--------------|----------|
| PDBs     | 282          | 194      |
| Residues | 115,440      | 76,889   |
| Helices  | 41,637       | 30,540   |
| Strands  | 26,708       | 18,789   |
| Loops    | 47,095       | 27,560   |



Table S3 Protein Test Set

---

|      |      |      |      |      |      |      |      |      |      |
|------|------|------|------|------|------|------|------|------|------|
| 1A17 | 1A1X | 1A6J | 1AH4 | 1AHS | 1AJ2 | 1AL3 | 1AMX | 1ANN | 1APA |
| 1ARB | 1ARV | 1AUG | 1AX0 | 1AYF | 1B16 | 1B4F | 1B66 | 1B67 | 1B7D |
| 1BBP | 1BBZ | 1BD8 | 1BEO | 1BF4 | 1BIX | 1BKP | 1BKR | 1BLI | 1BLX |
| 1BN8 | 1BOU | 1BPI | 1BQK | 1BR9 | 1BU5 | 1BUO | 1BV1 | 1BVY | 1BXS |
| 1BXY | 1BYQ | 1BYR | 1C08 | 1CEX | 1CHD | 1CJB | 1CJW | 1CNU | 1CO6 |
| 1CTF | 1CV8 | 1CYN | 1CYO | 1D2Z | 1D40 | 1D7D | 1DEA | 1DFU | 1DIO |
| 1DJ8 | 1DJR | 1DK8 | 1DLG | 1DLY | 1DP4 | 1DPJ | 1DQE | 1DV8 | 1DYN |
| 1DZ3 | 1E6I | 1E79 | 1EAI | 1ECM | 1ECP | 1ECY | 1EDM | 1EFV | 1EGP |
| 1EGW | 1EJ8 | 1EO9 | 1EP0 | 1EQO | 1ERT | 1EW4 | 1EYQ | 1F21 | 1F2K |
| 1F7D | 1FAS | 1FKJ | 1FLE | 1FLM | 1FLT | 1FOF | 1FQ0 | 1FUA | 1FXD |
| 1G31 | 1G43 | 1G6G | 1GDO | 1GPR | 1GUX | 1HCB | 1HCQ | 1HLE | 1HTP |
| 1HXN | 1IBR | 1IDA | 1IDO | 1INP | 1IRO | 1JAC | 1KPT | 1LTS | 1MJC |
| 1MNM | 1MOQ | 1MWP | 1MZM | 1NBA | 1NDD | 1NEC | 1NNC | 1NPK | 1OTF |
| 1PBV | 1PFK | 1PHR | 1PPF | 1PTF | 1PUC | 1QD9 | 1QEX | 1QGH | 1QHV |
| 1QIP | 1QKJ | 1QQ8 | 1QTW | 1REG | 1RFS | 1RKD | 1RVV | 1SEI | 1SML |
| 1SPP | 1SRV | 1STM | 1SUP | 1TCD | 1TIF | 1TML | 1UKZ | 1UNK | 1URO |
| 1UTE | 1VCC | 1VMO | 1WAP | 1WBA | 1XXA | 1YCS | 2ABK | 2ARC | 2ASR |
| 2AY1 | 2BNH | 2BOP | 2CEV | 2CPG | 2CRO | 2DOR | 2ERL | 2IZH | 2LIS |
| 2MTA | 2PII | 2PLC | 2POO | 2PRD | 2PRG | 2RN2 | 2TNF | 2TRC | 3FAP |
| 3FIB | 4FGF | 4MON | 4NOS |      |      |      |      |      |      |

---

Table S4 PCASSO Features

| Feature | Type     | Atoms Involved   | Feature | Type     | Atoms Involved |
|---------|----------|------------------|---------|----------|----------------|
| 1       | Distance | i, i-5           | 23      | Distance | i, j+2         |
| 2       | Distance | i, i-4           | 24      | Distance | i+1, j-2       |
| 3       | Distance | i, i-3           | 25      | Distance | i+1, j-1       |
| 4       | Distance | i, i-2           | 26      | Distance | i+1, j         |
| 5       | Distance | i, i-1           | 27      | Distance | i+1, j+1       |
| 6       | Distance | i, i+1           | 28      | Distance | i+1, j+2       |
| 7       | Distance | i, i+2           | 29      | Distance | i-1, k-2       |
| 8       | Distance | i, i+3           | 30      | Distance | i-1, k-1       |
| 9       | Distance | i, i+4           | 31      | Distance | i-1, k         |
| 10      | Distance | i, i+5           | 32      | Distance | i-1, k+1       |
| 11      | Angle    | i-1, i, i+1      | 33      | Distance | i-1, k+2       |
| 12      | Dihedral | i, i+1, i+2, i+3 | 34      | Distance | i, k-2         |
| 13      | Angle    | i-2, i, i+2      | 35      | Distance | i, k-1         |
| 14      | Distance | i-1, j-2         | 36      | Distance | i, k           |
| 15      | Distance | i-1, j-1         | 37      | Distance | i, k+1         |
| 16      | Distance | i-1, j           | 38      | Distance | i, k+2         |
| 17      | Distance | i-1, j+1         | 39      | Distance | i+1, k-2       |
| 18      | Distance | i-1, j+2         | 40      | Distance | i+1, k-1       |
| 19      | Distance | i, j-2           | 41      | Distance | i+1, k         |
| 20      | Distance | i, j-1           | 42      | Distance | i+1, k+1       |
| 21      | Distance | i, j             | 43      | Distance | i+1, k+2       |
| 22      | Distance | i, j+1           |         |          |                |

Table S5 Data for the three lowest SSE accuracy structures

| PDBID | Percent Accuracy |        |      |       | Correctly Predicted by PCASSO / DSSP |         |         |           |
|-------|------------------|--------|------|-------|--------------------------------------|---------|---------|-----------|
|       | Helices          | Strand | Loop | Total | Helices                              | Strand  | Loop    | Total     |
| 1CYO  | 96.6             | 75.0   | 79.5 | 84.1  | 28 / 29                              | 15 / 20 | 31 / 39 | 74 / 88   |
| 1MWP  | 78.6             | 82.9   | 89.4 | 85.4  | 11 / 14                              | 29 / 35 | 42 / 47 | 82 / 96   |
| 1G43  | 44.4             | 83.9   | 96.9 | 86.9  | 4 / 9                                | 73 / 87 | 62 / 64 | 139 / 160 |

Table S6 PCASSO accuracy comparison

| SSE    | Percent Accuracy <sup>a</sup> |
|--------|-------------------------------|
|        | PCASSO <sup>b</sup>           |
| Helix  | 93.7 (97.9)                   |
| Strand | 89.8 (95.9)                   |
| Loop   | 95.4 (87.8)                   |
| All    | 93.4                          |

<sup>a</sup>STRIDE is used as the reference. The true positive rate (sensitivity) is shown and the positive prediction value (precision) is in parentheses.

<sup>b</sup>Trained on DSSP SSE assignments
